# Supplementary material for: Self-Association of Okadaic Acid: Structural and Pharmacological Significance
Source: MDPI journal article supplement (doi:10.3390/md11061866), 2013-05-29
Supplement: s1 [file s1]

marinedrugs-11-01866-s001.mol
  corina  04141422403D 1   1.00000     0.00000 
CORINA 3.49 0023  12.04.2013
 57 63  0  0  0  0  0  0  0  0999 V2000
   -0.4643    0.7371    1.0934 C   0  0  0  0  0  0  0  0  0  0  0  0
   -0.1672   -0.7493    1.3071 C   0  0  0  0  0  0  0  0  0  0  0  0
   -1.4220   -1.4405    1.8491 C   0  0  0  0  0  0  0  0  0  0  0  0
   -2.5798   -1.2122    0.8724 C   0  0  0  0  0  0  0  0  0  0  0  0
   -2.7846    0.2934    0.6799 C   0  0  0  0  0  0  0  0  0  0  0  0
   -1.5705    0.8767    0.1997 O   0  0  0  0  0  0  0  0  0  0  0  0
    0.7655    1.4223    0.4941 C   0  0  0  0  0  0  0  0  0  0  0  0
    0.5189    2.9299    0.4097 C   0  0  0  0  0  0  0  0  0  0  0  0
    1.7693    3.6171   -0.0754 C   0  0  0  0  0  0  0  0  0  0  0  0
    1.9892    4.9053    0.2312 O   0  0  0  0  0  0  0  0  0  0  0  0
    2.5740    3.0084   -0.7402 O   0  0  0  0  0  0  0  0  0  0  0  0
    0.1723    3.4291    1.7031 O   0  0  0  0  0  0  0  0  0  0  0  0
   -0.6261    3.2055   -0.5670 C   0  0  0  0  0  0  0  0  0  0  0  0
   -3.1279    0.8865    1.9349 O   0  0  0  0  0  0  0  0  0  0  0  0
   -3.5426    2.2528    1.8130 C   0  0  0  0  0  0  0  0  0  0  0  0
   -4.8877    2.2853    1.0821 C   0  0  0  0  0  0  0  0  0  0  0  0
   -4.8176    1.4153   -0.1425 C   0  0  0  0  0  0  0  0  0  0  0  0
   -3.8843    0.5279   -0.3173 C   0  0  0  0  0  0  0  0  0  0  0  0
   -3.7732   -1.7928    1.4022 O   0  0  0  0  0  0  0  0  0  0  0  0
   -3.6968    2.8706    3.2041 C   0  0  0  0  0  0  0  0  0  0  0  0
   -2.3706    2.8361    3.9190 C   0  0  0  0  0  0  0  0  0  0  0  0
   -2.2526    2.1850    5.0495 C   0  0  0  0  0  0  0  0  0  0  0  0
   -0.9264    2.1505    5.7644 C   0  0  0  0  0  0  0  0  0  0  0  0
   -5.8706    1.5784   -1.2081 C   0  0  0  0  0  0  0  0  0  0  0  0
   -4.1657    4.3207    3.0690 C   0  0  0  0  0  0  0  0  0  0  0  0
   -1.0868    2.6561    7.2204 C   0  0  0  0  0  0  0  0  0  0  0  0
    0.3554    3.1478    7.5231 C   0  0  0  0  0  0  0  0  0  0  0  0
    0.8138    3.6782    6.1500 C   0  0  0  0  0  0  0  0  0  0  0  0
   -0.0042    3.0650    5.1492 O   0  0  0  0  0  0  0  0  0  0  0  0
    2.2800    3.3080    5.9244 C   0  0  0  0  0  0  0  0  0  0  0  0
    2.7473    3.8934    4.5874 C   0  0  0  0  0  0  0  0  0  0  0  0
    2.5142    5.4066    4.5974 C   0  0  0  0  0  0  0  0  0  0  0  0
    1.0321    5.6863    4.8646 C   0  0  0  0  0  0  0  0  0  0  0  0
    0.6543    5.0961    6.1095 O   0  0  0  0  0  0  0  0  0  0  0  0
    2.8860    5.9585    3.3333 O   0  0  0  0  0  0  0  0  0  0  0  0
    2.8111    7.3874    3.2792 C   0  0  0  0  0  0  0  0  0  0  0  0
    1.4127    7.8103    3.6753 C   0  0  0  0  0  0  0  0  0  0  0  0
    0.8180    7.2040    4.9305 C   0  0  0  0  0  0  0  0  0  0  0  0
   -0.5801    7.4933    4.9922 O   0  0  0  0  0  0  0  0  0  0  0  0
    3.8259    7.9926    4.2513 C   0  0  0  0  0  0  0  0  0  0  0  0
    3.7821    9.5186    4.1498 C   0  0  0  0  0  0  0  0  0  0  0  0
    0.7383    8.6731    2.9564 C   0  0  0  0  0  0  0  0  0  0  0  0
    4.7050   10.1268    5.2078 C   0  0  0  0  0  0  0  0  0  0  0  0
    4.7580   11.6450    5.0263 C   0  0  0  0  0  0  0  0  0  0  0  0
    5.2978   11.9739    3.6320 C   0  0  0  0  0  0  0  0  0  0  0  0
    5.6185   12.2135    6.0155 O   0  0  0  0  0  0  0  0  0  0  0  0
    5.7214   13.6370    5.9519 C   0  0  0  0  0  0  0  0  0  0  0  0
    6.2984   14.0465    4.5943 C   0  0  0  0  0  0  0  0  0  0  0  0
    5.4039   13.4945    3.4801 C   0  0  0  0  0  0  0  0  0  0  0  0
    5.1370    7.5306    3.9200 O   0  0  0  0  0  0  0  0  0  0  0  0
    4.1682    9.7983    6.6024 C   0  0  0  0  0  0  0  0  0  0  0  0
    6.6816   11.3449    3.4580 C   0  0  0  0  0  0  0  0  0  0  0  0
    6.6459   14.1325    7.0668 C   0  0  0  0  0  0  0  0  0  0  0  0
    6.0323   13.7781    8.4248 C   0  0  0  0  0  0  0  0  0  0  0  0
    4.6314   14.3910    8.5153 C   0  0  0  0  0  0  0  0  0  0  0  0
    3.7847   13.8826    7.3455 C   0  0  0  0  0  0  0  0  0  0  0  0
    4.4263   14.2181    6.1136 O   0  0  0  0  0  0  0  0  0  0  0  0
  1  2  1  0      
  2  3  1  0      
  3  4  1  0      
  4  5  1  0      
  5  6  1  0      
  1  7  1  0      
  7  8  1  0      
  8  9  1  0      
  9 10  1  0      
  9 11  2  0      
  8 12  1  0      
  8 13  1  0      
 15 16  1  0      
 16 17  1  0      
 17 18  2  0      
 18  5  1  0      
  4 19  1  0      
  5 14  1  0      
 15 14  1  0      
 15 20  1  0      
 20 21  1  0      
 21 22  2  0      
 17 24  1  0      
 20 25  1  0      
 23 26  1  0      
 26 27  1  0      
 27 28  1  0      
 23 29  1  0      
 28 29  1  0      
 28 30  1  0      
 30 31  1  0      
 31 32  1  0      
 32 33  1  0      
 36 37  1  0      
 37 38  1  0      
 38 33  1  0      
 33 34  1  0      
 32 35  1  0      
 36 35  1  0      
 38 39  1  0      
 36 40  1  0      
 40 41  1  0      
 42 37  2  0      
 41 43  1  0      
 43 44  1  0      
 44 45  1  0      
 46 47  1  0      
 47 48  1  0      
 48 49  1  0      
 49 45  1  0      
 40 50  1  0      
 43 51  1  0      
 45 52  1  0      
 44 46  1  0      
 53 54  1  0      
 54 55  1  0      
 56 57  1  0      
 47 57  1  0      
 47 53  1  0      
 56 55  1  0      
 23 22  1  0      
  1  6  1  0      
 28 34  1  0      
M  END
$$$$
