# Supplementary material for: Self-Association of Okadaic Acid: Structural and Pharmacological Significance
Source: MDPI journal article supplement (doi:10.3390/md11061866), 2013-05-29
Supplement: s2 [file s2]

marinedrugs-11-01866-s001.mol
  ChemDraw04151410312D

 57 63  0  0  0  0  0  0  0  0999 V2000
   -6.3418    0.0000    0.0000 C   0  0  0  0  0  0  0  0  0  0  0  0
   -6.3418   -0.8250    0.0000 C   0  0  0  0  0  0  0  0  0  0  0  0
   -5.6273   -1.2375    0.0000 C   0  0  0  0  0  0  0  0  0  0  0  0
   -4.9129   -0.8250    0.0000 C   0  0  0  0  0  0  0  0  0  0  0  0
   -4.9129    0.0000    0.0000 C   0  0  0  0  0  0  0  0  0  0  0  0
   -5.6273    0.4125    0.0000 O   0  0  0  0  0  0  0  0  0  0  0  0
   -7.0563    0.4125    0.0000 C   0  0  0  0  0  0  0  0  0  0  0  0
   -7.7707    0.0000    0.0000 C   0  0  0  0  0  0  0  0  0  0  0  0
   -8.4852    0.4125    0.0000 C   0  0  0  0  0  0  0  0  0  0  0  0
   -9.1996    0.0000    0.0000 O   0  0  0  0  0  0  0  0  0  0  0  0
   -8.4852    1.2375    0.0000 O   0  0  0  0  0  0  0  0  0  0  0  0
   -7.7707   -0.8250    0.0000 O   0  0  0  0  0  0  0  0  0  0  0  0
   -8.3541   -0.5834    0.0000 C   0  0  0  0  0  0  0  0  0  0  0  0
   -4.1984   -0.4125    0.0000 O   0  0  0  0  0  0  0  0  0  0  0  0
   -3.4839    0.0000    0.0000 C   0  0  0  0  0  0  0  0  0  0  0  0
   -3.4839    0.8250    0.0000 C   0  0  0  0  0  0  0  0  0  0  0  0
   -4.1984    1.2375    0.0000 C   0  0  0  0  0  0  0  0  0  0  0  0
   -4.9129    0.8250    0.0000 C   0  0  0  0  0  0  0  0  0  0  0  0
   -4.1984   -1.2375    0.0000 O   0  0  0  0  0  0  0  0  0  0  0  0
   -2.7694   -0.4125    0.0000 C   0  0  0  0  0  0  0  0  0  0  0  0
   -2.0550    0.0000    0.0000 C   0  0  0  0  0  0  0  0  0  0  0  0
   -1.3405   -0.4125    0.0000 C   0  0  0  0  0  0  0  0  0  0  0  0
   -0.6260    0.0000    0.0000 C   0  0  0  0  0  0  0  0  0  0  0  0
   -4.1984    2.0625    0.0000 C   0  0  0  0  0  0  0  0  0  0  0  0
   -2.7694   -1.2375    0.0000 C   0  0  0  0  0  0  0  0  0  0  0  0
   -0.4125    0.7969    0.0000 C   0  0  0  0  0  0  0  0  0  0  0  0
    0.4125    0.7969    0.0000 C   0  0  0  0  0  0  0  0  0  0  0  0
    0.6260    0.0000    0.0000 C   0  0  0  0  0  0  0  0  0  0  0  0
    0.0033   -0.3919    0.0000 O   0  0  0  0  0  0  0  0  0  0  0  0
    0.6260   -0.8250    0.0000 C   0  0  0  0  0  0  0  0  0  0  0  0
    1.3405   -1.2375    0.0000 C   0  0  0  0  0  0  0  0  0  0  0  0
    2.0550   -0.8250    0.0000 C   0  0  0  0  0  0  0  0  0  0  0  0
    2.0550    0.0000    0.0000 C   0  0  0  0  0  0  0  0  0  0  0  0
    1.3405    0.4125    0.0000 O   0  0  0  0  0  0  0  0  0  0  0  0
    2.7694   -1.2375    0.0000 O   0  0  0  0  0  0  0  0  0  0  0  0
    3.4839   -0.8250    0.0000 C   0  0  0  0  0  0  0  0  0  0  0  0
    3.4839    0.0000    0.0000 C   0  0  0  0  0  0  0  0  0  0  0  0
    2.7694    0.4125    0.0000 C   0  0  0  0  0  0  0  0  0  0  0  0
    2.7694    1.2375    0.0000 O   0  0  0  0  0  0  0  0  0  0  0  0
    4.1984   -1.2375    0.0000 C   0  0  0  0  0  0  0  0  0  0  0  0
    4.9129   -0.8250    0.0000 C   0  0  0  0  0  0  0  0  0  0  0  0
    4.1984    0.4125    0.0000 C   0  0  0  0  0  0  0  0  0  0  0  0
    5.6273   -1.2375    0.0000 C   0  0  0  0  0  0  0  0  0  0  0  0
    6.3418   -0.8250    0.0000 C   0  0  0  0  0  0  0  0  0  0  0  0
    6.3418    0.0000    0.0000 C   0  0  0  0  0  0  0  0  0  0  0  0
    7.0563   -1.2375    0.0000 O   0  0  0  0  0  0  0  0  0  0  0  0
    7.7707   -0.8250    0.0000 C   0  0  0  0  0  0  0  0  0  0  0  0
    7.7707    0.0000    0.0000 C   0  0  0  0  0  0  0  0  0  0  0  0
    7.0563    0.4125    0.0000 C   0  0  0  0  0  0  0  0  0  0  0  0
    4.1984   -2.0625    0.0000 O   0  0  0  0  0  0  0  0  0  0  0  0
    5.6273   -2.0625    0.0000 C   0  0  0  0  0  0  0  0  0  0  0  0
    5.6273    0.4125    0.0000 C   0  0  0  0  0  0  0  0  0  0  0  0
    7.7707   -1.6500    0.0000 C   0  0  0  0  0  0  0  0  0  0  0  0
    8.4852   -2.0625    0.0000 C   0  0  0  0  0  0  0  0  0  0  0  0
    9.1996   -1.6500    0.0000 C   0  0  0  0  0  0  0  0  0  0  0  0
    9.1996   -0.8250    0.0000 C   0  0  0  0  0  0  0  0  0  0  0  0
    8.4852   -0.4125    0.0000 O   0  0  0  0  0  0  0  0  0  0  0  0
  1  2  1  0      
  2  3  1  0      
  3  4  1  0      
  4  5  1  0      
  5  6  1  0      
  1  7  1  0      
  7  8  1  0      
  8  9  1  0      
  9 10  1  0      
  9 11  2  0      
  8 12  1  1      
  8 13  1  6      
 15 16  1  0      
 16 17  1  0      
 17 18  2  0      
 18  5  1  0      
  4 19  1  6      
  5 14  1  6      
 15 14  1  1      
 15 20  1  0      
 20 21  1  0      
 21 22  2  0      
 17 24  1  0      
 20 25  1  1      
 23 26  1  0      
 26 27  1  0      
 27 28  1  0      
 23 29  1  1      
 28 29  1  6      
 28 30  1  0      
 30 31  1  0      
 31 32  1  0      
 32 33  1  0      
 36 37  1  0      
 37 38  1  0      
 38 33  1  0      
 33 34  1  1      
 32 35  1  6      
 36 35  1  1      
 38 39  1  6      
 36 40  1  0      
 40 41  1  0      
 42 37  2  0      
 41 43  1  0      
 43 44  1  0      
 44 45  1  0      
 46 47  1  0      
 47 48  1  0      
 48 49  1  0      
 49 45  1  0      
 40 50  1  6      
 43 51  1  1      
 45 52  1  6      
 44 46  1  6      
 53 54  1  0      
 54 55  1  0      
 56 57  1  0      
 47 57  1  1      
 47 53  1  6      
 56 55  1  0      
 23 22  1  6      
  1  6  1  1      
 28 34  1  1      
M  END
